# Supplementary material for: Paraben residues in wastewater and surface water: a case study of KwaZulu Natal and Gauteng provinces (South Africa) during the COVID-19 pandemic
Source: Frontiers journal article supplement (doi:10.3389/fenvs.2024.1418375), 2024-08-06
Supplement: Data_Sheet_1.xlsx [file Data_Sheet_1.xlsx]

## Sheet: Authors
Paraben residues in wastewater and surface water: A case study of KwaZulu Natal and Gauteng Provices (South Afrca) during the COVID-19 pandemic
Neliswa Mpayipheli1,2, Anele Mpupa1,2, Ntakadzeni Edwin Madala3, Philiswa Nosizo Nomngongo1,2
1Department of Chemical Sciences, University of Johannesburg, Doornfontein Campus, P.O. Box 17011, Johannesburg, 2028, South Africa
2Department of Science and Innovation-National Research Foundation South African Research Chair Initiative (DSI-NRF SARChI): Nanotechnology for Water, University of Johannesburg, Doornfontein, 2028, South Africa
3Department of Biochemistry and Microbiology, Faculty of Science, Engineering and Agriculture, University of Venda, Thohoyandou, South Africa

## Sheet: KwaZulu Natal- 2nd wave 
				MEtPB								EtPB
					RQAcute			RQ Chronic			RQAcute			RQ Chronic
			PNEC (µg/L)	800	340	630	2100	240	160	PNEC	520	74	140	1800	160	80
		Sample name	MEC (µg/L)	Algae	Daphnia	Fish	Algae	Daphnia	Fish	MEC	Algae	Daphnia	Fish	Algae	Daphnia	Fish
		Howick-upstream	1.32	0.00165	0.00388235	0.00209524	0.000628571	0.0055	0.00825	1.647	0.00316731	0.0222568	0.0117643	0.000915	0.0102938	0.0205875
		Albert fall downstream	ND							ND
		Darvil UP	1.29	0.0016125	0.00379412	0.00204762	0.000614286	0.005375	0.0080625	1.67	0.00321154	0.0225676	0.0119286	0.000927778	0.0104375	0.020875
		Darvil UP	3.45	0.0043125	0.0101471	0.00547619	0.00164286	0.014375	0.0215625	0.54	0.00103846	0.0072973	0.00385714	0.0003	0.003375	0.00675
		Dassenhoek-river up	0.094	0.0001175	0.000276471	0.000149206	4.47619e-05	0.000391667	0.0005875	1.27	0.00244231	0.0171622	0.00907143	0.000705556	0.0079375	0.015875
		Dassenhoek-river	1.76	0.0022	0.00517647	0.00279365	0.000838095	0.00733333	0.011	1.42	0.00273077	0.0191892	0.0101429	0.000788889	0.008875	0.01775
		Kwa0engezi	1.53	0.0019125	0.0045	0.00242857	0.000728571	0.006375	0.0095625	0.31	0.000596154	0.00418919	0.00221429	0.000172222	0.0019375	0.003875
		Kwa0engezi	4.03	0.0050375	0.0118529	0.00639683	0.00191905	0.0167917	0.0251875	0.59	0.00113462	0.00797297	0.00421429	0.000327778	0.0036875	0.007375
		Mpumalanga upstream	5.08	0.00635	0.0149412	0.00806349	0.00241905	0.0211667	0.03175	0.38	0.000730769	0.00513514	0.00271429	0.000211111	0.002375	0.00475
		Mpumalanga-downstream	2.41	0.0030125	0.00708824	0.0038254	0.00114762	0.0100417	0.0150625	0.32	0.000615385	0.00432432	0.00228571	0.000177778	0.002	0.004
		Hammesdale upstream	1.04	0.0013	0.00305882	0.00165079	0.000495238	0.00433333	0.0065	ND
		Hammesdale -down stream1	1.28	0.0016	0.00376471	0.00203175	0.000609524	0.00533333	0.008	1.54	0.00296154	0.0208108	0.011	0.000855556	0.009625	0.01925
			PrPB	RQ Acute			RQ Chronic			BuPB	RQ Acute			RQ Chronic
			PNEC	360	20	49	740	110	40	PNEC	95	19	31	80	80	30
		Sample name	MEC	Algae	Daphnia	Fish	Algae	Daphnia	Fish	MEC	Algae	Daphnia	Fish	Algae	Daphnia	Fish
		Howick-upstream	5.75	0.0159722	0.2875	0.117347	0.00777027	0.0522727	0.14375	0.93	0.00978947	0.0489474	0.03	0.011625	0.011625	0.031
		Albert fall downstream	0	0	0	0	0	0	0	ND
		Darvil UP	7.4	0.0205556	0.37	0.15102	0.01	0.0672727	0.185	3.82	0.0402105	0.201053	0.123226	0.04775	0.04775	0.127333
		Darvil UP	2.35	0.00652778	0.1175	0.0479592	0.00317568	0.0213636	0.05875	ND
		Dassenhoek-river up	5.13	0.01425	0.2565	0.104694	0.00693243	0.0466364	0.12825	1.03	0.0108421	0.0542105	0.0332258	0.012875	0.012875	0.0343333
		Dassenhoek-river	3.75	0.0104167	0.1875	0.0765306	0.00506757	0.0340909	0.09375	2.37	0.0249474	0.124737	0.0764516	0.029625	0.029625	0.079
		Kwa0engezi	ND							0.88	0.00926316	0.0463158	0.0283871	0.011	0.011	0.0293333
		Kwa0engezi	ND							1.13	0.0118947	0.0594737	0.0364516	0.014125	0.014125	0.0376667
		Mpumalanga upstream	2.16	0.006	0.108	0.0440816	0.00291892	0.0196364	0.054	ND
		Mpumalanga-downstream	ND							ND
		Hammesdale upstream	ND							ND
		Hammesdale -down stream1	0.59	0.00163889	0.0295	0.0120408	0.000797297	0.00536364	0.01475	6.88	0.0724211	0.362105	0.221935	0.086	0.086	0.229333

## Sheet: KwaZulu Natal- 4th wave 
	MePB		RQAcute			RQ Chronic
	PNEC (µg/L)	800	340	630	2100	240	160
Sample name	MEC (µg/L)	Algae	Daphnia	Fish	Algae	Daphnia	Fish
Howick river upstream	2.53	0.0031625	0.00744118	0.00401587	0.00120476	0.0105417	0.0158125
Darvil river upstream	1.45	0.0018125	0.00426471	0.00230159	0.000690476	0.00604167	0.0090625
Darvil river downstream	0.653	0.00081625	0.00192059	0.00103651	0.000310952	0.00272083	0.00408125
Mpumalanga river upstream	0.15	0.0001875	0.000441176	0.000238095	7.14286e-05	0.000625	0.0009375
Mpumalanga river downstream
Hammersdale river downstream
Hammersdale river downstream	0.087	0.00010875	0.000255882	0.000138095	4.14286e-05	0.0003625	0.00054375
	EtPB	RQAcute			RQ Chronic
	PNEC (µg/L)	520	74	140	1800	160	80
Sample name	MEC (µg/L)	Algae	Daphnia	Fish	Algae	Daphnia	Fish
Howick river upstream	16.4	0.0315385	0.221622	0.117143	0.00911111	0.1025	0.205
Darvil river upstream	0
Darvil river downstream	0
Mpumalanga river upstream	3.14	0.00603846	0.0424324	0.0224286	0.00174444	0.019625	0.03925
Mpumalanga river downstream	0
Hammersdale river downstream	0
Hammersdale river downstream	1.84	0.00353846	0.0248649	0.0131429	0.00102222	0.0115	0.023
	PrPB	RQ Acute			RQ Chronic
	PNEC (µg/L)	360	20	49	740	110	40
Sample name	MEC (µg/L)	Algae	Daphnia	Fish	Algae	Daphnia	Fish
Howick river upstream	5.82	0.0161667	0.291	0.118776	0.00786486	0.0529091	0.1455
Darvil river upstream	0.63	0.00175	0.0315	0.0128571	0.000851351	0.00572727	0.01575
Darvil river downstream	0.83	0.00230556	0.0415	0.0169388	0.00112162	0.00754545	0.02075
Mpumalanga river upstream	0.094	0.000261111	0.0047	0.00191837	0.000127027	0.000854545	0.00235
Mpumalanga river downstream
Hammersdale river downstream
Hammersdale river downstream	0.14	0.000388889	0.007	0.00285714	0.000189189	0.00127273	0.0035

## Sheet: Gauteng-3rd wave
	MePB		RQAcute			RQ Chronic		EtPB	RQAcute			RQ Chronic
	PNEC (µg/L)	800	340	630	2100	240	160	PNEC	520	74	140	1800	160	80
Sampling name	MEC (µg/L)	Algae	Daphnia	Fish	Algae	Daphnia	Fish	MEC	Algae	Daphnia	Fish	Algae	Daphnia	Fish
Apies River (below Rooiwal east WWTP)
Apies River (Hammanskraal)	2.43	0.0030375	0.00714706	0.00385714	0.00115714	0.010125	0.0151875	1.03	0.00198077	0.0139189	0.00735714	0.000572222	0.0064375	0.012875
Apies River (after Babelegi WWTP)	0.87	0.0010875	0.00255882	0.00138095	0.000414286	0.003625	0.0054375	0	0	0	0	0	0	0
Hennops River	3.14	0.003925	0.00923529	0.00498413	0.00149524	0.0130833	0.019625	0.84	0.00161538	0.0113514	0.006	0.000466667	0.00525	0.0105
Pienaars River (before Baviaanspoort WWTP) upstream	0.096	0.00012	0.000282353	0.000152381	4.57143e-05	0.0004	0.0006	0.14	0.000269231	0.00189189	0.001	7.77778e-05	0.000875	0.00175
Pienaars River (after Baviaanspoort WWTP) downstream									0	0	0	0	0	0
Pienaars River (Moloto road)	1.04	0.0013	0.00305882	0.00165079	0.000495238	0.00433333	0.0065	0.58	0.00111538	0.00783784	0.00414286	0.000322222	0.003625	0.00725
Pienaars River (Zeekoegat WWTP) upstream	1.16	0.00145	0.00341176	0.00184127	0.000552381	0.00483333	0.00725	0	0	0	0	0	0	0
Pienaars River (Zooekgat WWTP) downstream	0.81	0.0010125	0.00238235	0.00128571	0.000385714	0.003375	0.0050625	0	0	0	0	0	0	0
Pienaars River (Mamelodi)	1.22	0.001525	0.00358824	0.00193651	0.000580952	0.00508333	0.007625	0.16	0.000307692	0.00216216	0.00114286	8.88889e-05	0.001	0.002
Tolwane River (after Klipgat WWTW) downstream	0.98	0.001225	0.00288235	0.00155556	0.000466667	0.00408333	0.006125	0.76	0.00146154	0.0102703	0.00542857	0.000422222	0.00475	0.0095
	PrPB	RQ Acute			RQ Chronic			BuPB	RQ Acute			RQ Chronic
	PNEC (µg/L)	360	20	49	740	110	40	PNEC	95	19	31	80	80	30
Sampling name	MEC (µg/L)	Algae	Daphnia	Fish	Algae	Daphnia	Fish	MEC	Algae	Daphnia	Fish	Algae	Daphnia	Fish
Apies River (below Rooiwal east WWTP)	0.78	0.00216667	0.039	0.0159184	0.00105405	0.00709091	0.0195	1.31	0.0137895	0.0689474	0.0422581	0.016375	0.016375	0.0436667
Apies River (Hammanskraal)	2.06	0.00572222	0.103	0.0420408	0.00278378	0.0187273	0.0515
Apies River (after Babelegi WWTP)	1.13	0.00313889	0.0565	0.0230612	0.00152703	0.0102727	0.02825
Hennops River	2.33	0.00647222	0.1165	0.047551	0.00314865	0.0211818	0.05825
Pienaars River (before Baviaanspoort WWTP) upstream	0.36	0.001	0.018	0.00734694	0.000486486	0.00327273	0.009
Pienaars River (after Baviaanspoort WWTP) downstream		0	0	0	0	0	0
Pienaars River (Moloto road)	1.35	0.00375	0.0675	0.027551	0.00182432	0.0122727	0.03375
Pienaars River (Zeekoegat WWTP) upstream	1.47	0.00408333	0.0735	0.03	0.00198649	0.0133636	0.03675
Pienaars River (Zooekgat WWTP) downstream	1.01	0.00280556	0.0505	0.0206122	0.00136486	0.00918182	0.02525
Pienaars River (Mamelodi)	1.18	0.00327778	0.059	0.0240816	0.00159459	0.0107273	0.0295
Tolwane River (after Klipgat WWTW) downstream	1.04	0.00288889	0.052	0.0212245	0.00140541	0.00945455	0.026	0.43	0.00452632	0.0226316	0.013871	0.005375	0.005375	0.0143333
